# Supplementary material for: Osteopontin Splicing Isoforms Contribute to Endometriotic Proliferation, Migration, and Epithelial-Mesenchymal Transition in Endometrial Epithelial Cells
Source: MDPI journal article supplement (doi:10.3390/ijms232315328), 2022-12-05
Supplement: s1 [file s1]

**Table S1. Patient clinical characteristics.**

| Patient No. | Age | Preintervention diagnosis | Lesion size                                           | Classification/Staging (ASRM for endometriosis OR Sonographic Classification of Adenomyosis) | Ca-125 level |
|-------------|-----|---------------------------|-------------------------------------------------------|----------------------------------------------------------------------------------------------|--------------|
| 1           | 31  | Myoma                     | 95*43 mm                                              |                                                                                              |              |
| 2           | 33  | Myoma                     | 87*113*75 mm                                          |                                                                                              |              |
| 3           | 40  | Myoma                     | 12*12*13 mm                                           |                                                                                              |              |
| 4           | 41  | Myoma                     | 57*43*54 mm                                           |                                                                                              |              |
| 5           | 32  | Myoma                     | 57*82*54 mm                                           |                                                                                              |              |
| 6           | 38  | Myoma                     | 62*38*46 mm                                           |                                                                                              |              |
| 7           | 43  | Myoma                     | 36*73*120 mm                                          |                                                                                              |              |
| 8           | 35  | Myoma                     | 95*43*60 mm                                           |                                                                                              |              |
| 9           | 39  | Myoma                     | 87*75*103 mm                                          |                                                                                              |              |
| 10          | 32  | Myoma                     | 52*12*16 mm                                           |                                                                                              |              |
| 11          | 35  | Myoma                     | 95*48*60 mm                                           |                                                                                              |              |
| 12          | 41  | Myoma                     | 45*48*50 mm                                           |                                                                                              |              |
| 13          | 37  | Adenomyosis               | 81*68*77 mm                                           | Severe                                                                                       | 102.4 U/mL   |
| 14          | 41  | Adenomyosis               | 62*38*46 mm                                           | Severe                                                                                       | 36.2 U/mL    |
| 15          | 42  | Adenomyosis               | 70*50*70 mm                                           | Severe                                                                                       | 36.08 U/mL   |
| 16          | 40  | Adenomyosis               | 78*85*86 mm                                           | Severe                                                                                       | 20.3 U/mL    |
| 17          | 41  | Adenomyosis               | 60*53*59 mm                                           | Severe                                                                                       | 31 U/mL      |
| 18          | 41  | Adenomyosis               | 68*62*64 mm                                           | Severe                                                                                       | 67.83 U/mL   |
| 19          | 36  | Adenomyosis               | 100*78*15 mm                                          | Severe                                                                                       | 140.1 U/mL   |
| 20          | 42  | Adenomyosis               | 71*60*77 mm                                           | Severe                                                                                       |              |
| 21          | 39  | Adenomyosis               | 69*48*69 mm                                           | Severe                                                                                       | 75.02 U/mL   |
| 22          | 40  | Adenomyosis               | 67*60*74 mm                                           | Severe                                                                                       |              |
| 23          | 39  | Adenomyosis               | 54*46*61 mm                                           | Severe                                                                                       | 64.72 U/mL   |
| 24          | 42  | Adenomyosis               | 55*41*53 mm                                           | Severe                                                                                       |              |
| 25          | 32  | Ovarian Endometrioma      | R 51*41*53 mm                                         | III                                                                                          | 23.39 U/mL   |
| 26          | 33  | Ovarian Endometrioma      | R 94*72*113 mm                                        | IV                                                                                           |              |
| 27          | 32  | Ovarian Endometrioma      | Bilateral (R 76*57 mm, 42*45 mm, L 25*21 mm)          | IV                                                                                           | 109.7 U/mL   |
| 28          | 38  | Ovarian Endometrioma      | R 40*40 mm                                            | III                                                                                          | 99.96 U/mL   |
| 29          | 40  | Ovarian Endometrioma      | L 62*51*58 mm                                         | III                                                                                          | 19.92 U/mL   |
| 30          | 33  | Ovarian Endometrioma      | L 40*23*40 mm                                         | III                                                                                          |              |
| 31          | 33  | Ovarian Endometrioma      | L 71*31*34 mm                                         | IV                                                                                           | 119.8 U/mL   |
| 32          | 33  | Ovarian Endometrioma      | R 71*34*32 mm                                         | III                                                                                          | 119.9 U/mL   |
| 33          | 35  | Ovarian Endometrioma      | Bilateral (58*37*67 mm and 46*36*61 mm)               | III                                                                                          | 23.39 U/mL   |
| 34          | 32  | Ovarian Endometrioma      | L 56*36*53 mm, 47*42*50 mm                            | III                                                                                          | 99.96 U/mL   |
| 35          | 28  | Ovarian Endometrioma      | Bilateral (R 52*44 mm, 10*9 mm, 15*14 mm, L 53*39 mm) | IV                                                                                           | 109.7 U/mL   |
| 36          | 41  | Ovarian Endometrioma      | L 40*23*40 mm                                         | IV                                                                                           | 19 U/mL      |

**Table S2. The oligonucleotide sequences of primer pairs used in this study.**

| ID                  | Accession Number  | Primers | Oligonucleotide Sequence 5'- 3' | PCR products Base Pair |
|---------------------|-------------------|---------|---------------------------------|------------------------|
| qOPN                | A. NM_001040058.1 | Forward | CACCTGTGCCATACCAGTTAA           | 531 bp                 |
|                     | B. NM_000582.2    | Reverse | GGTGATGTCCTCGTCTGTAGCATC        | 489 bp                 |
|                     | C. NM_001040060.1 |         |                                 | 450 bp                 |
| OPNa                | NM_001040058.1    | Forward | GGATCCCTCACTACCATGAG            | 903 bp                 |
|                     |                   | Reverse | AAGCTTGACCTCAGAAGATGCACT        |                        |
| $\alpha V$ integrin | NM_002210         | Forward | GACTGTGTGGAAGACAATGTCTGTAAACCC  | 304 bp                 |
|                     |                   | Reverse | CCAGCTAAGAGTTGAGTTCCAGCC        |                        |
| $\beta 3$ integrin  | NM_000212         | Forward | GTGCTGACGCTAACTGACC             | 284 bp                 |
|                     |                   | Reverse | CATGGTAGTGGAGGCAGAGT            |                        |
| CD44 standard       | NM_000610         | Forward | CAACTCCATCTGTGCAGCAAA           | 300 bp                 |
|                     |                   | Reverse | GTAACCTCCTGAAGTGCTGCTC          |                        |
| CD44 variant        | NM_000610         | Forward | AACGCTTCAGCCTACTGCAAA           | 127 bp                 |
|                     |                   | Reverse | TCTTCCAAGCCTTCATGTGATG          |                        |
| E-Cadherin          | NM_004360         | Forward | TCCCATCAGCTGCCCAGAAA            | 500 bp                 |
|                     |                   | Reverse | ATGACTCCTGTGTTCTCTGTTA          |                        |
| N-Cadherin          | NM_001792         | Forward | CACTGCTCAGGACCCAGAT             | 415 bp                 |
|                     |                   | Reverse | TAAGCCGAGTGATGGTCC              |                        |
| VCAM1               | NM_001199834      | Forward | CCGGAAGGTGTATGAACTG             | 431 bp                 |
|                     |                   | Reverse | TCCATGGTGATCTCTCCTC             |                        |
| ICAM1               | NM_000201         | Forward | GTCCCCCTCAAAAGTCATCC            | 942 bp                 |
|                     |                   | Reverse | AACCCCATTCAGCGTCACCT            |                        |
| $\beta$ actin       | NM_001101.3       | Forward | CGG ATG TCC ACG TCA CAC TT      | 500 bp                 |
|                     |                   | Reverse | GTT GCT ATC CAG GCT GTG CT      |                        |

**Table S3. Single stranded RNA oligonucleotides of OPN and CD44v used for knockdown study.**

| <i>siRNA</i>  |           | Oligonucleotide Sequence 5'-3' |
|---------------|-----------|--------------------------------|
| <i>siOPN</i>  | Sense     | GGUCAAAAUCUAAGAAAGUUTT         |
|               | Antisense | GCUGACCUCUGCAAGGCUUUCAAUA      |
| <i>siCD44</i> | Sense     | CAUCGGAUUUGAGACCUGCAGGUAU      |
|               | Antisense | AUACCUGCAGGUCUCAAUCCGAUG       |
